# Supplementary material for: Outcomes and interventions in patients transported to hospital with ongoing CPR after out-of-hospital cardiac arrest – An observational study
Source: PubMed Central journal article supplement (PMC8640866; doi:10.1016/j.resplu.2021.100170), 2021-10-16
Supplement: mmc1.pdf [file mmc1.pdf]

# Supplement

Outcomes and interventions in patients transported to hospital with ongoing CPR after out-of-hospital cardiac arrest – an observational study by Schmidbauer, S et al.

Table S1 - Classification of interventions against suspected reversible causes of arrest

| Reversible cause            | Intervention                                     |
|-----------------------------|--------------------------------------------------|
| <b>Hypoxia</b>              | Advanced airway manoeuvres <sup>†</sup>          |
| <b>Hypovolemia</b>          | Blood transfusion <sup>‡</sup>                   |
| <b>Hypo-/hyperkalemia</b>   | Potassium correction <sup>§</sup>                |
| <b>Hypothermia</b>          | Rewarming manoeuvres including ECMO              |
| <b>Thrombosis</b>           | Coronary angiography<br>Intravenous thrombolysis |
| <b>Tamponade</b>            | Pericardial decompression                        |
| <b>Tension pneumothorax</b> | Pleural decompression                            |
| <b>Toxins</b>               | Administration of any antidote                   |

<sup>†</sup>Any stated airway manoeuvre targeted against either a suspected cause of arrest (such as foreign body removal) or factor sustaining cardiac arrest (such as removal of aspirated secretions preventing effective oxygenation). Routine endotracheal intubation was not classified as an advanced airway manoeuvre.

<sup>‡</sup>Due to a high frequency of crystalloid administration without any recorded indication, only transfusion of blood products was classified as a targeted intervention against hypovolemia.

<sup>§</sup>Any targeted therapy against either hypo- or hyperkalemia (such as potassium administration or glucose/insulin administration) or the negative effects thereof (such as calcium administration).

Table S2 - Overview of supportive therapies

| Therapy                                    | No. of attempts | No. of attempts followed by sustained ROSC | No. of attempts followed by survival to hospital discharge |
|--------------------------------------------|-----------------|--------------------------------------------|------------------------------------------------------------|
| Intravenous buffer administration          | 65              | 14                                         | 2                                                          |
| Infusion of inotropic or vasopressor agent | 3               | 2                                          | 1                                                          |
| Medical therapy against bradycardia        | 2               | 2                                          | 0                                                          |
| Pacemaker (external or transvenous)        | 6               | 2                                          | 0                                                          |
| Repositioning of defibrillator pads        | 2               | 2                                          | 0                                                          |
| <b>Unique patients</b>                     | <b>69</b>       | <b>17</b>                                  | <b>2</b>                                                   |

Individual patients might have received more than one therapy. One survivor who declined data collection on in-hospital therapies excluded.

Table S3 – Baseline characteristics of patients with sustained prehospital ROSC

|                                                                    | <b>All patients</b><br>N=158 |
|--------------------------------------------------------------------|------------------------------|
| <b>Age (years)</b>                                                 | 69.2 (14.9)                  |
| <b>Sex:</b>                                                        |                              |
| Female                                                             | 56 (35.4%)                   |
| Male                                                               | 102 (64.6%)                  |
| <b>Initial rhythm:</b>                                             |                              |
| Shockable                                                          | 67 (42.9%)                   |
| Asystole                                                           | 48 (30.8%)                   |
| PEA                                                                | 32 (20.5%)                   |
| Unknown, no shocks delivered                                       | 9 (5.77%)                    |
| Missing                                                            | 2 (1.27%)                    |
| <b>Defibrillation performed</b>                                    | 72 (50.7%)                   |
| Missing                                                            | 16 (10.1%)                   |
| <b>Witnessed</b>                                                   | 128 (81.0%)                  |
| <b>EMS witnessed</b>                                               | 21 (16.8%)                   |
| Missing                                                            | 33 (20.9%)                   |
| <b>Presumed cause of arrest:</b>                                   |                              |
| Cardiac                                                            | 59 (53.2%)                   |
| Non-cardiac                                                        | 52 (46.8%)                   |
| Missing                                                            | 47 (29.7%)                   |
| <b>Total duration of resuscitation (minutes)</b>                   | 15.0 [10.0;27.0]             |
| <b>Duration of resuscitation after hospital arrival (minutes)</b>  | 0.00 [0.00;0.00]             |
| <b>Duration of resuscitation before hospital arrival (minutes)</b> | 15.0 [8.25;26.0]             |
| <b>Use of automated chest compression device</b>                   | 110 (70.1%)                  |
| Missing                                                            | 1 (0.63%)                    |
| <b>Location of arrest:</b>                                         |                              |
| Place of residence                                                 | 91 (60.7%)                   |
| Public location                                                    | 35 (23.3%)                   |
| On hospital grounds                                                | 2 (1.33%)                    |
| Other location                                                     | 22 (14.7%)                   |
| Missing                                                            | 8 (5.06%)                    |
| <b>Location of sustained ROSC:</b>                                 |                              |
| Prehospital, on scene                                              | 129 (81.6%)                  |
| Prehospital, in ambulance                                          | 27 (17.1%)                   |
| Prehospital, unknown location                                      | 2 (1.27%)                    |
| <b>Admitted to intensive care or ward:</b>                         |                              |
| Intensive care                                                     | 105 (66.5%)                  |
| Regular ward                                                       | 8 (5.06%)                    |
| Admitted, level of care unknown                                    | 26 (16.5%)                   |
| Not admitted                                                       | 19 (12.0%)                   |
| <b>Discharged alive</b>                                            | 73 (46.2%)                   |

Data are presented as mean (SD), absolute (relative) frequency or median [IQR]. Missing values (where present) are presented for all categorical variables.

**Table S4 – Sensitivity analysis: Diagnostic performance of the universal termination of resuscitation rule**

| <b>Cohort</b>                           | <b>PPV (%)</b> | <b>95 % CI (%)</b> | <b>Specificity (%)</b> |
|-----------------------------------------|----------------|--------------------|------------------------|
| <b>Valid data (n = 371)</b>             | 98.4           | 94.9-99.5          | 71.4                   |
| <b>Best case (n = 409)<sup>†</sup></b>  | 98.8           | 96.1-99.6          | 71.4                   |
| <b>Worst case (n = 409)<sup>‡</sup></b> | 98.4           | 94.9-99.5          | 71.4                   |

PPV: Positive predictive value. <sup>†</sup>All missing cases imputed as uTOR = terminate (i.e. true positives). <sup>‡</sup>All missing cases imputed as uTOR = transport (i.e. false negatives)
